# Supplementary material
Source: MDPI journal article supplement (https://www.mdpi.com/2076-3417/12/8/3873)
Supplement: s1 [file s1 › applsci-1648844-supplementary.pdf]

# **Mortality Prediction Artificial Intelligence Model for Gastric Cancer Surgery Based on Body Morphometry, Nutritional, and Surgical Information: Feasibility study**

## **Table of Contents**

|                                                                                                                                                                                              |   |
|----------------------------------------------------------------------------------------------------------------------------------------------------------------------------------------------|---|
| Figure S1. Diagram of the modeling process. Independent variables refer to quantitative indices of various patients' characteristics, and dependent variables refer to survival outcome..... | 2 |
| Table S1. Description of gastric surgery registries data. ....                                                                                                                               | 3 |
| Table S2. Standardization of time-dependent continuous features in the development and all validation sets.....                                                                              | 7 |

Figure S1. Diagram of the modeling process. Independent variables refer to quantitative indices of various patients’ characteristics, and dependent variables refer to survival outcome.

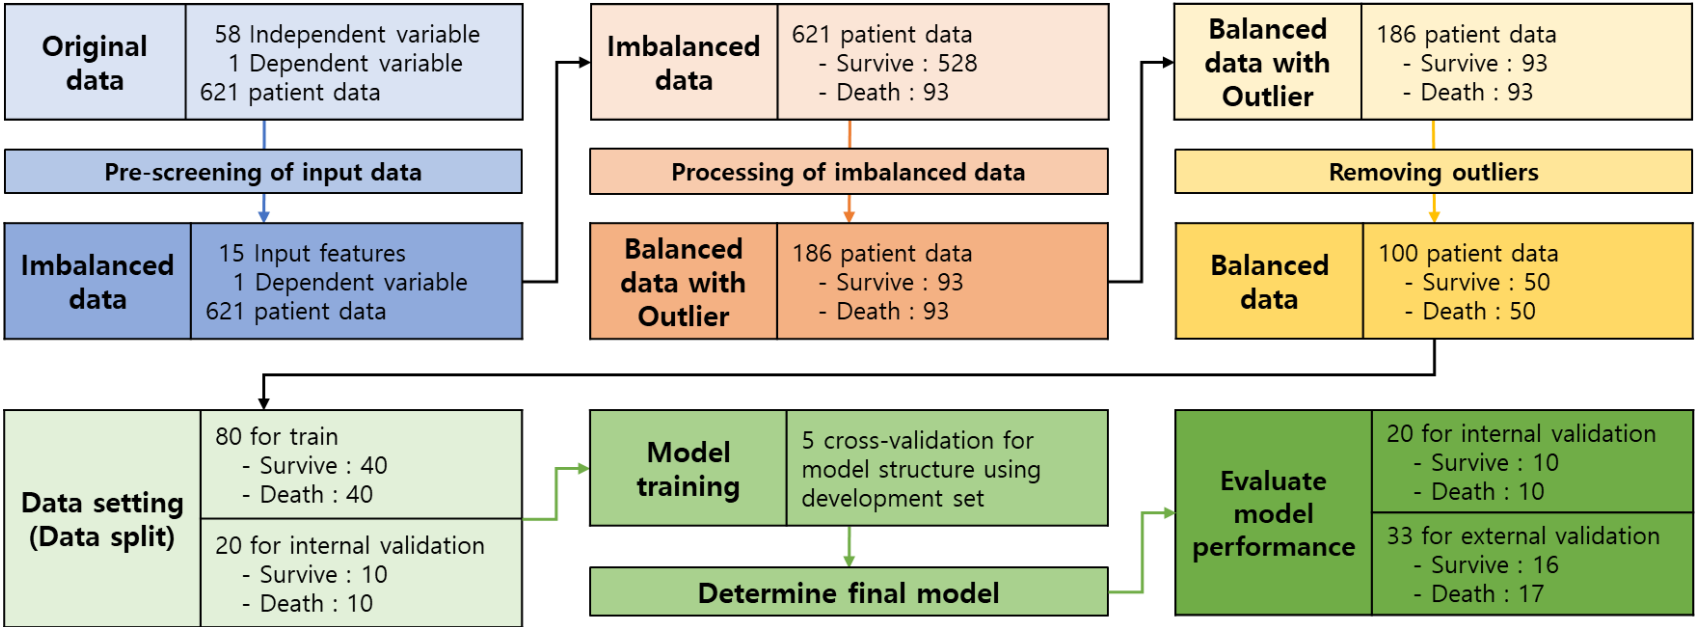

**Table S1. Description of gastric surgery registries data.**

| No of variables | Variable name | Description of variable                                                                          | Code                                                                                                                                                                                                      | No of features | Feature name             | Description of feature                                                                           | Selected feature for AI training |
|-----------------|---------------|--------------------------------------------------------------------------------------------------|-----------------------------------------------------------------------------------------------------------------------------------------------------------------------------------------------------------|----------------|--------------------------|--------------------------------------------------------------------------------------------------|----------------------------------|
| 1               | SUBJID        | Unique subject ID                                                                                |                                                                                                                                                                                                           | 1              | SUBJID                   | Unique subject ID                                                                                |                                  |
| 2               | OVERALLSUR    | Survival or not                                                                                  | 0: Survival, 1: Death                                                                                                                                                                                     | 2              | OVERALLSUR               | Survival or not                                                                                  |                                  |
| 3               | AGE           | Age                                                                                              |                                                                                                                                                                                                           | 3              | AGE_standardized         | Age                                                                                              | Yes                              |
| 4               | SEX           | Sex                                                                                              | 1: Male, 2: Female                                                                                                                                                                                        | 4              | SEX                      | Sex                                                                                              | Yes                              |
| 5               | HT            | Height at the time of gastric cancer diagnosis (cm)                                              |                                                                                                                                                                                                           | 5              | HT_standardized          | Height at the time of gastric cancer diagnosis (cm)                                              | Yes                              |
| 6               | WT            | Weight at the time of gastric cancer diagnosis (kg)                                              |                                                                                                                                                                                                           | 6              | $\Delta$ WT_standardized | Standardized difference between WT and WT_1yr                                                    |                                  |
| 7               | WT_1yr        | Weight one year after surgery (kg)                                                               |                                                                                                                                                                                                           |                |                          |                                                                                                  |                                  |
| 8               | AJCC7         | Classification of cancer staging according to AJCC Cancer Staging Manual 7 <sup>th</sup> Edition |                                                                                                                                                                                                           | 7              | AJCC7                    | Classification of cancer staging according to AJCC Cancer Staging Manual 7 <sup>th</sup> Edition | Yes                              |
| 9               | CUREINTENT    | Treatment intention                                                                              | 1: Curative, 2: Palliative                                                                                                                                                                                | 8              | CUREINTENT               | Treatment intention                                                                              |                                  |
| 10              | COMORBIDTY    | Underlying disease                                                                               | 1: DM, 2: HTN, 3: CAH, 4: Liver cirrhosis, 5: TB, 6: MI, 7: CVA, 8: Valvular HD, 9: COPD, 10: Asthma, 11: CRF                                                                                             | 9              | COMORBIDTY               | Underlying disease                                                                               |                                  |
| 11              | GASOPHIS      | Past history of stomach operation                                                                | 0: No, 1: Yes                                                                                                                                                                                             | 10             | GASOPHIS                 | Past history of stomach operation                                                                |                                  |
| 12              | ESDHIS        | Past history of ESD                                                                              | 0: No, 1: Yes                                                                                                                                                                                             | 11             | ESDHIS                   | Past history of ESD                                                                              |                                  |
| 13              | OPDATE        | Date of operation                                                                                | YYYYMMDD                                                                                                                                                                                                  | 12             | OPDATE                   | Date of operation                                                                                |                                  |
| 14              | LAPVSOPEN     | Operation method                                                                                 | 1: Laparoscopy, 2: Open                                                                                                                                                                                   | 13             | LAPVSOPEN                | Operation method                                                                                 |                                  |
| 15              | TY_OP         | Type of operation                                                                                | 1: Distal gastrectomy,<br>2: Total gastrectomy,<br>3: Etc                                                                                                                                                 | 14             | TY_OP                    | Type of operation                                                                                | Yes                              |
| 16              | TY_AN         | Type of anastomosis                                                                              | 1: GD (gastroduodenostomy),<br>2: RYGJ (Roux en Y gastrojejunostomy),<br>3: GJ (gastrojejunostomy),<br>4: GJJJ (gastrojejunostomy with jejunojejunostomy),<br>5: RY (Roux-en-Y),<br>6: Delta (Billoth 1), | 15             | TY_AN                    | Type of anastomosis                                                                              | Yes                              |

|    |              |                                    |                                                                                                                                 |    |              |                                    |  |
|----|--------------|------------------------------------|---------------------------------------------------------------------------------------------------------------------------------|----|--------------|------------------------------------|--|
|    |              |                                    | 7: Etc                                                                                                                          |    |              |                                    |  |
| 17 | LND          | Lymph Node Dissection              | 1: D1, 2: D1+a, 3: D1+b, 4: D2                                                                                                  | 16 | LND          | Lymph Node Dissection              |  |
| 18 | LASTSURVDATE | Confirmation date of last survival | YYYYMMDD                                                                                                                        | 17 | LASTSURVDATE | Confirmation date of last survival |  |
| 19 | TUSIZE       | Tumor size (mm)                    |                                                                                                                                 | 18 | TUSIZE       | Tumor size (mm)                    |  |
| 20 | TULONGLOC    | location of tumor (longitudinal)   | 1: Upper third, 2: Middle third, 3: Lower third, 4: GEJ, 5: Entire, 6: UM, 7: ML                                                | 19 | TULONGLOC    | location of tumor (longitudinal)   |  |
| 21 | TUAXILOC     | location of tumor (axial)          | 1: LC (lesser curvature),<br>2: GC (greater curvature),<br>3: AW (arterial wall),<br>4: PW (posterior wall),<br>5: CIR (circle) | 20 | TUAXILOC     | location of tumor (axial)          |  |
| 22 | TUNUM        | Number of tumors                   |                                                                                                                                 | 21 | TUNUM        | Number of tumor                    |  |
| 23 | AGC_TYPE     | Advanced gastric cancer            | 1: AGC-B1<br>2: AGC-B2<br>3: AGC-B3<br>4: AGC-B4<br>5: AGC-B5                                                                   | 22 | AGC_TYPE     | Advanced gastric cancer            |  |
| 24 | EGC_TYPE     | Early gastric cancer               | 1: EGC-I, 2: EGC-IIa/EGC-IIb/EGC-IIc, 3: EGC-III                                                                                | 23 | EGC_TYPE     | Early gastric cancer               |  |
| 25 | PATHO_TYPE   | Pathological tumor type            | 1: PAP, 2: TUB1, 3: TUB2, 4: TUB3, 5: SRC, 6: MUC, 7: Etc                                                                       | 24 | PATHO_TYPE   | Pathological tumor type            |  |
| 26 | LAUREN       | Classification of Lauren           | 1: Intestinal,<br>2: Diffuse,<br>3: Mixed,<br>4: Indeterminate                                                                  | 25 | LAUREN       | Classification of Lauren           |  |
| 27 | DEPTHINV     | T stage                            | 1: Mucosa,<br>2: Submucosa,<br>3: Proper muscle,<br>4: Subserosa,<br>5: Serosa exposure,<br>6: Adjacent organ invasion          | 26 | DEPTHINV     | T stage                            |  |
| 28 | NSTAGE       | N stage                            | 0: N0, 1: N1, 2: N2, 3: N3a, 4: N3b                                                                                             | 27 | NSTAGE       | N stage                            |  |
| 29 | NOMETALN     | Number of Metastatic lymph nodes   |                                                                                                                                 | 28 | NOMETALN     | Number of Metastatic lymph nodes   |  |

|    |               |                                                                       |                                            |    |                               |                                                                       |     |
|----|---------------|-----------------------------------------------------------------------|--------------------------------------------|----|-------------------------------|-----------------------------------------------------------------------|-----|
| 30 | NORETNL       | Number of Retrieved lymph nodes                                       |                                            | 29 | NORETNL                       | Number of Retrieved lymph nodes                                       |     |
| 31 | LVINV         | Lymphovascular invasion                                               | 0: Negative, 1: Positive                   | 30 | LVINV                         | Lymphovascular invasion                                               |     |
| 32 | PERININV      | Perineural invasion                                                   | 0: Negative, 1: Positive, 2: Not evaluated | 31 | PERININV                      | Perineural invasion                                                   |     |
| 33 | ENE           | Extranodal extension of metastatic lymph node (pathological findings) | 0: Negative, 1: Positive                   | 32 | ENE                           | Extranodal extension of metastatic lymph node (pathological findings) |     |
| 34 | DIA_ENE       | Diameter of extranodal extension of metastatic lymph node (mm)        |                                            | 33 | DIA_ENE                       | Diameter of extranodal extension of metastatic lymph node (mm)        |     |
| 35 | PRM           | Proximal resection margin (mm)                                        |                                            | 34 | PRM                           | Proximal resection margin (mm)                                        |     |
| 36 | DRM           | Distal resection margin (mm)                                          |                                            | 35 | DRM                           | Distal resection margin (mm)                                          |     |
| 37 | Sfat_preop    | Subcutaneous fat area before surgery (cm <sup>2</sup> )               |                                            | 36 | $\Delta$ Sfat_standardized    | Standardized difference between Sfat_preop and Sfat_1yr               | Yes |
| 38 | Sfat_1yr      | Subcutaneous fat area one year after surgery (cm <sup>2</sup> )       |                                            |    |                               |                                                                       |     |
| 39 | Muscle_preop  | Skeletal muscle area before surgery (cm <sup>2</sup> )                |                                            | 37 | $\Delta$ Muscle_standardized  | Standardized difference between Muscle_preop and Muscle_1yr           |     |
| 40 | Muscle_1yr    | Skeletal muscle area one year after surgery (cm <sup>2</sup> )        |                                            |    |                               |                                                                       |     |
| 41 | Vfat_preop    | Visceral fat area before surgery (cm <sup>2</sup> )                   |                                            | 38 | $\Delta$ Vfat_standardized    | Standardized difference between Vfat_preop and Vfat_1yr               | Yes |
| 42 | Vfat_1yr      | Visceral fat area one year after surgery (cm <sup>2</sup> )           |                                            |    |                               |                                                                       |     |
| 43 | Chol_preop    | Cholesterol value before surgery (mg/dL)                              |                                            | 39 | $\Delta$ Chol_standardized    | Standardized difference between Chol_preop and Chol_1yr               | Yes |
| 44 | Chol_1yr      | Cholesterol value one year after surgery (mg/dL)                      |                                            |    |                               |                                                                       |     |
| 45 | Protein_preop | Protein value before surgery                                          |                                            | 40 | $\Delta$ Protein_standardized | Standardized difference between Protein_preop and Protein_1yr         |     |
| 46 | Protein_1yr   | Protein value one year after surgery                                  |                                            |    |                               |                                                                       |     |
| 47 | Albumin_preop | Albumin value before surgery                                          |                                            | 41 | $\Delta$ Albumin_standardized | Standardized difference between Albumin_preop and Albumin_1yr         | Yes |

|    |             |                                                                                 |                                                        |    |                             |                                                           |     |
|----|-------------|---------------------------------------------------------------------------------|--------------------------------------------------------|----|-----------------------------|-----------------------------------------------------------|-----|
| 48 | Albumin_1yr | Albumin value one year after surgery                                            |                                                        |    |                             |                                                           |     |
| 49 | Hb_preop    | Hemoglobin value before surgery                                                 |                                                        | 42 | $\Delta$ Hb_standardized    | Standardized difference between Hb_preop and Hb_1yr       | Yes |
| 50 | Hb_1yr      | Hemoglobin value one year after surgery                                         |                                                        |    |                             |                                                           |     |
| 51 | SURVDUR     | Survival duration (Month)                                                       | Confirmation date of last survival - Date of operation | 43 | SURVDUR                     | Survival duration (Month)                                 |     |
| 52 | NRI_preop   | Nutritional risk index before surgery                                           |                                                        | 44 | $\Delta$ NRI_standardized   | Standardized difference between NRI_preop and NRI_1yr     | Yes |
| 53 | NRI_1yr     | Nutritional risk index one year after surgery                                   |                                                        |    |                             |                                                           |     |
| 54 | BMI_preop   | BMI before surgery (kg/m <sup>2</sup> )                                         |                                                        | 45 | $\Delta$ BMI_standardized   | Standardized difference between BMI_preop and BMI_1yr     | Yes |
| 55 | BMI_1y      | BMI one year after surgery (kg/m <sup>2</sup> )                                 |                                                        |    |                             |                                                           |     |
| 56 | MuH_preop   | Skeletal muscle index before surgery (cm <sup>2</sup> /m <sup>2</sup> )         |                                                        | 46 | $\Delta$ MuH_standardized   | Standardized difference between MuH_preop and MuH_1yr     | Yes |
| 57 | MuH_1yr     | Skeletal muscle index one year after surgery (cm <sup>2</sup> /m <sup>2</sup> ) |                                                        |    |                             |                                                           |     |
| 58 | MuBMI_preop | Skeletal muscle index before surgery                                            |                                                        | 47 | $\Delta$ MuBMI_standardized | Standardized difference between MuBMI_preop and MuBMI_1yr | Yes |
| 59 | MuBMI_1yr   | Skeletal muscle index one year after surgery                                    |                                                        |    |                             |                                                           |     |

**Table S2. Standardization of time-dependent continuous features in the development and all validation sets**

| Features                | Development set<br>(n = 80) | All validation set<br>(n = 53) | <i>p</i> -value |
|-------------------------|-----------------------------|--------------------------------|-----------------|
| BMI                     | -0.08 ± 0.01                | -0.01 ± 0.01                   | 0.42            |
| SFA                     | -0.35 ± 0.26                | -0.22 ± 0.87                   | 0.22            |
| VFA                     | -0.57 ± 0.20                | -0.39 ± 0.83                   | 0.07            |
| SMA/height <sup>2</sup> | -0.05 ± 0.07                | -0.06 ± 0.06                   | 0.52            |
| SMA/BMI                 | 0.04 ± 0.08                 | 0.04 ± 0.08                    | 0.77            |
| NRI                     | -0.03 ± 0.06                | -0.02 ± 0.08                   | 0.90            |
| Cholesterol             | -0.06 ± 0.16                | -0.02 ± 0.27                   | 0.27            |
| Hemoglobin              | -0.07 ± 0.09                | -0.02 ± 0.21                   | 0.06            |
| Albumin                 | 0.02 ± 0.10                 | 0.03 ± 0.13                    | 0.65            |

Data are mean ± standard deviation. BMI = body mass index, NRI = nutritional risk index, SFA = subcutaneous fat area, SMA = skeletal muscle area, VFA = visceral fat area.
